# Supplementary material
Source: PubMed Central journal article supplement (PMC10132447)
Supplement: NIHMS1886576-supplement-Supp_Tables_and_Supp_Figs.pdf [file NIHMS1886576-supplement-Supp_Tables_and_Supp_Figs.pdf]

**Table S1. Genes mutated in PDACs of KPeC mice analyzed by exomic NGS sequencing. Related to Figure 1.**

| <b>KPeC tumour</b> | <b>Number of mutations</b> | <b>Mutated Genes</b>                                                                                                                                                                                                                                                                                                                                                                          |
|--------------------|----------------------------|-----------------------------------------------------------------------------------------------------------------------------------------------------------------------------------------------------------------------------------------------------------------------------------------------------------------------------------------------------------------------------------------------|
| ATQ 141            | 4                          | <i>Lama1, Gm436, Phf20, Vmn2r45</i>                                                                                                                                                                                                                                                                                                                                                           |
| ATQ 270            | 3                          | <i>Plscr4, Chd5, Ripk2</i>                                                                                                                                                                                                                                                                                                                                                                    |
| ATQ 274            | 3                          | <i>Mtap1a, Csf2ra, G2e3</i>                                                                                                                                                                                                                                                                                                                                                                   |
| ATQ 281            | 15                         | <i>Zfp457 (2)*, Grin2b, Ppp3cc, Olfr968, Trf, Sbf2, Chpt1, Enpp1, Stx4a (3), Ikzf4, Slc16a5, Fam71b</i>                                                                                                                                                                                                                                                                                       |
| ATQ 290            | 14                         | <i>Ivns1abp, Gykl1, D4Ert22e, Tsen54, Pdia3, Tsc2, Glyr1, Trio, Skint6, Oprk1, Prrc2a, Duoxa1, 2410089E03Rik, Aim1</i>                                                                                                                                                                                                                                                                        |
| ATQ 303            | 17                         | <i>Ret, Zfp369, Olfr1006, Trip12, Pot1a, Vmn2r51, Wdr69, Larp1b, Myh15, Serpine1, Cltc, Creld2, Olfr1462, 2610507B11Rik, Ptar1, Adamts9, Trim28</i>                                                                                                                                                                                                                                           |
| ATQ 799            | 50                         | <i>Lars, Serbp1, B3gat1, Usp37, Hacl1, Apol6, Oxr1, Cpd, Zc3h12a, Flt4, Trim41, Ireb2, Pgm1, Vwa2, Bhlhe40, Fer114, Thpo, Ict1, Mll2, Cmpk2, Alg10b, Pik3ca, Vmn1r191, Bmp5, Dock6, Acy3, Gria4, Brip1, H2-M10.3, Lce1e, BC055004, Gpr50, Mamdc2, Reep6, Tas2r122, Hectd1, Cep164, Otop3, Olfr733, Prss54, 2410089E03Rik, Micalcl, Rrm1, Itga11, Kirrel2, Olfr617, Nras, Dpf1, Rin2, Actb</i> |
| BEH 112            | 2                          | <i>Dub1, Zfyve9</i>                                                                                                                                                                                                                                                                                                                                                                           |
| BEH 280            | 7                          | <i>Skint6, Plxnd1, Hsp90aa1, Prcp, Cyt11, Amdhd1, Olfr1395</i>                                                                                                                                                                                                                                                                                                                                |
| BEH 420            | 13                         | <i>Tep1, Actc1, Psmb7, Loxl4, Krt36, Ccng1, Scarf1, Fat3, Radil, Tcfap2a, Vmn2r77 (2), Scn1a</i>                                                                                                                                                                                                                                                                                              |
| BEH 461            | 18                         | <i>Sytl3, Pigb, Golgb1, Nipbl, Olfr895, Exosc10, Mfsd4, Igf1r, Col16a1, Trip12, Derl2, Zfp423, Rgma, Zfp759 (2), Vmn2r67 (2), Nbn</i>                                                                                                                                                                                                                                                         |

**A**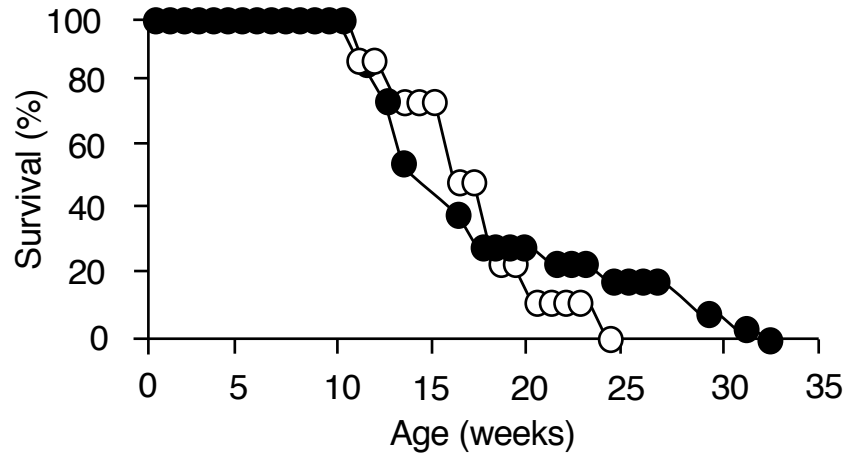**B**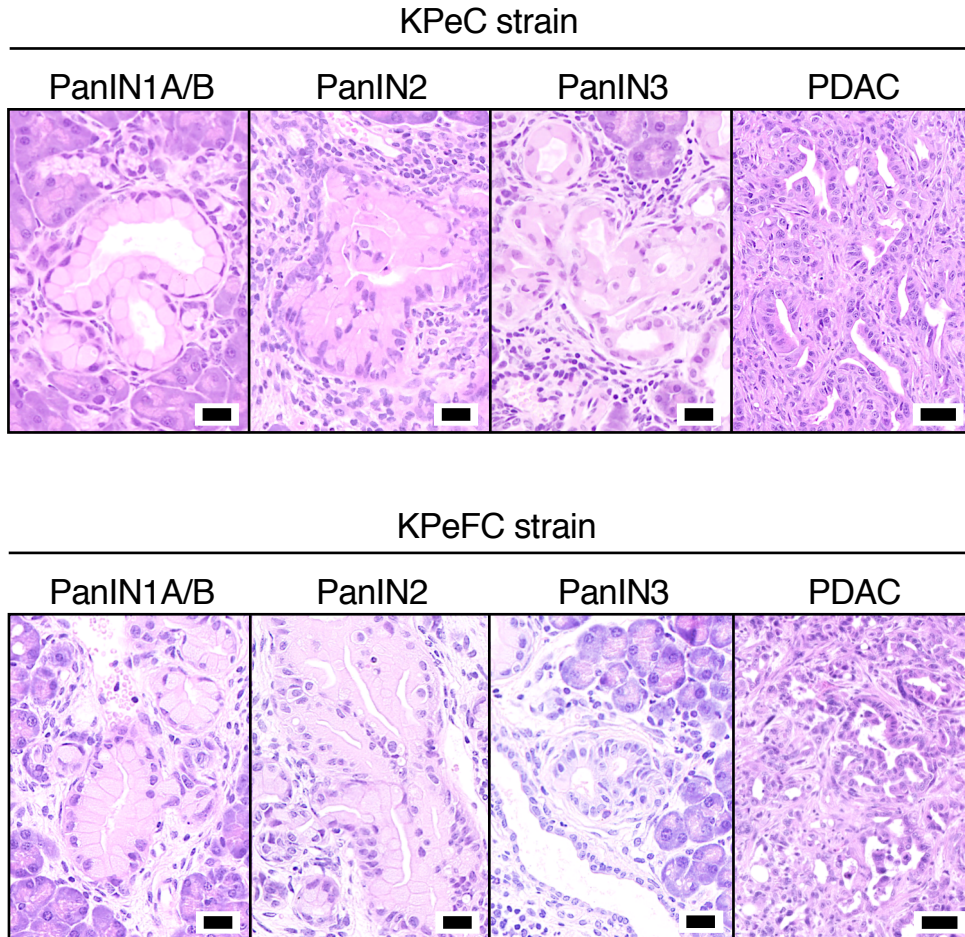

**Figure S1. Tumor development in the KPeC and KPeFC strains. Related to Figure 1.**

(A) Survival of KPeC (solid circles, n=20) and KPeFC (open circles, n=8) mice. All mice died of PDAC at the indicated times.

(B) Representative pancreatic lesions of KPeC and KPeFC mice stained with H&E. Scale bars represent 20  $\mu\text{m}$  (PanIN1A/B, PanIN2, PanIN3) and 50  $\mu\text{m}$  (PDAC).





**Figure S2. Mice not included in the trial. Related to Figure 3.**

(A) Spurious expression of the FlpO recombinase. Fluorescent labeling in representative sections of PDAC, healthy pancreas, skin and intestine of KPeFC;*Rosa26*<sup>+/CAG-tdTomato-EGFP</sup> mice exposed to TMX for 4 weeks. Dotted white line indicates a small EGFP<sup>+</sup> papilloma. Arrows indicate two recombinant cells in intestine. Scale bar represents 50  $\mu\text{m}$ .

(B) Limited Cre-mediated cleavage of *Egfr*<sup>lox</sup> and *Raf1*<sup>lox</sup> alleles, as determined by the expression of EGFR and c-RAF proteins, in representative KPeFC and KPeFC;*Egfr*<sup>lox/lox</sup>;*Raf1*<sup>lox/lox</sup> mice after TMX exposure. GAPDH served as a loading control.



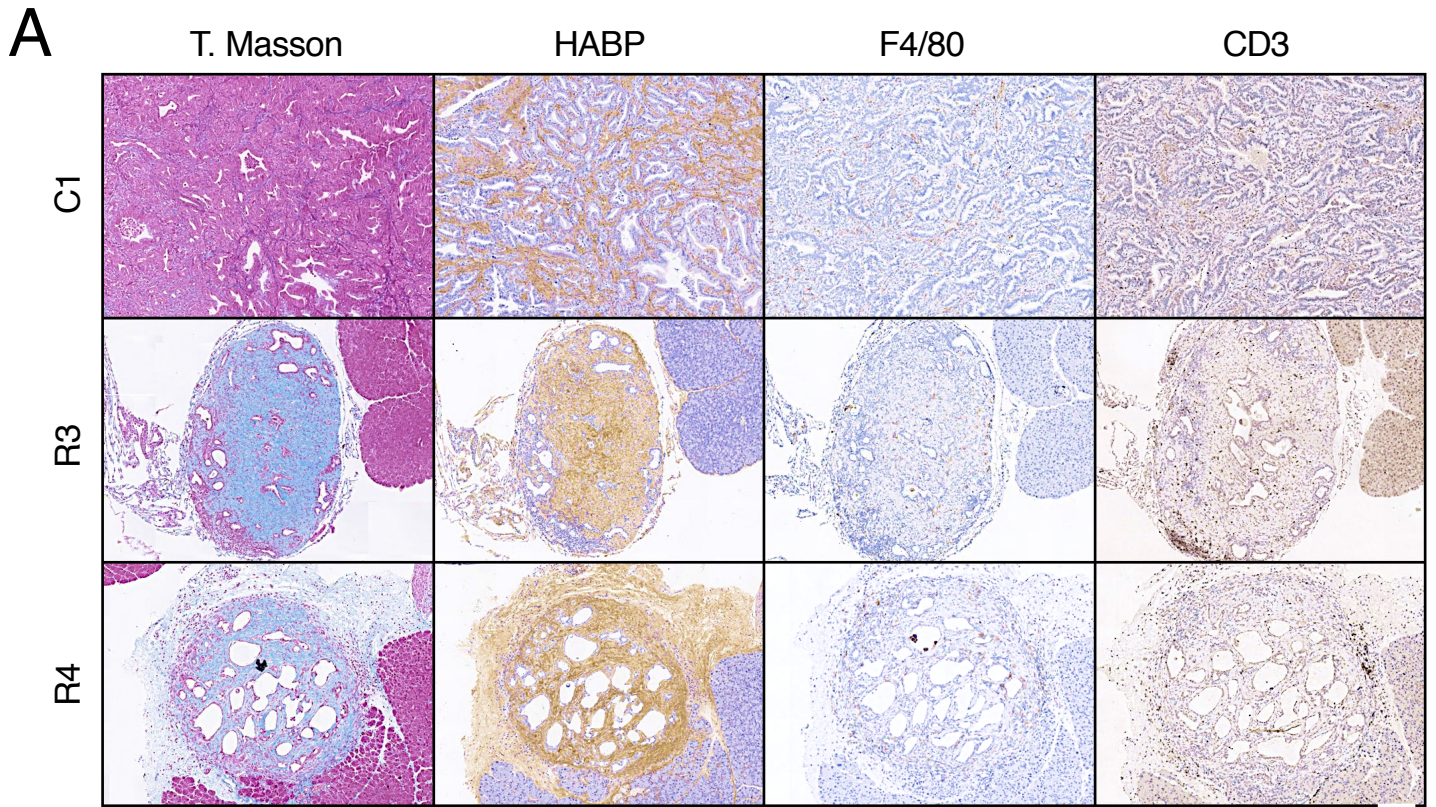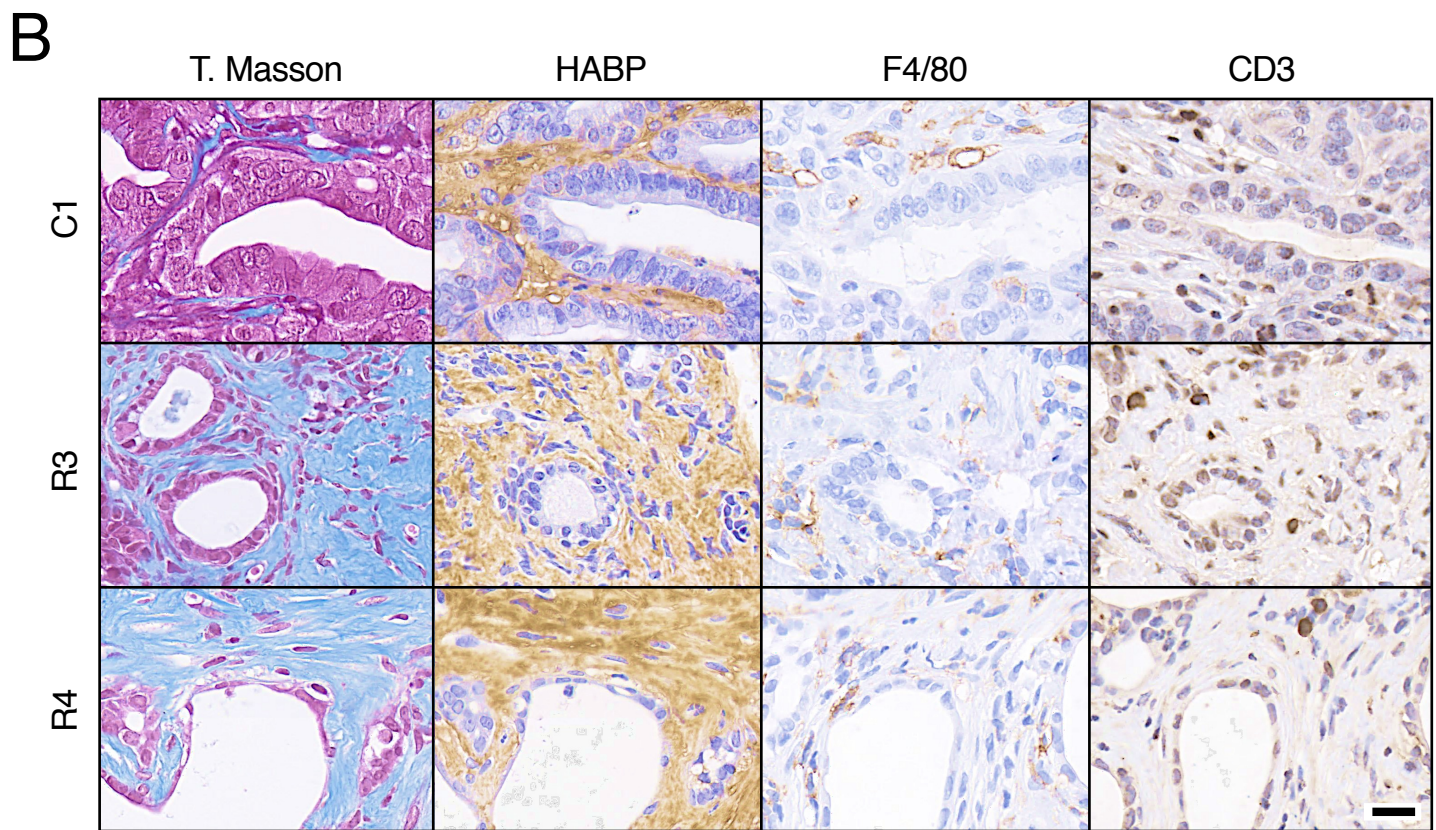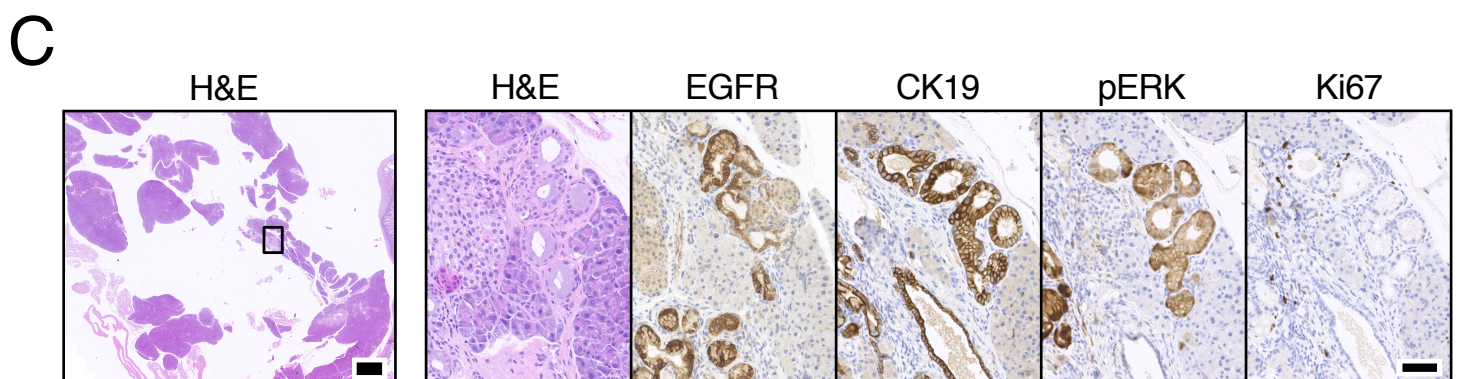



**Figure S3. Histological characterization of residual scar lesions and PanINs present in “Regressor” mice after TMX exposure. Related to Figure 3.**

(A and B) Low (A) and high (B) magnification of representative sections of a PDAC present in control KPeFC;*Egfr*<sup>+/+</sup>;*Raf1*<sup>+/+</sup> C1 mouse and in the scar lesions of KPeFC;*Egfr*<sup>lox/lox</sup>;*Raf1*<sup>lox/lox</sup> R3 and R4 mice stained with Masson's trichrome (T. Masson), Hyaluronic Acid Binding Protein (HABP), F4/80 and CD3. Scale bars represents 100  $\mu\text{m}$  (A) and 20  $\mu\text{m}$  (B).

(C) Representative H&E stained paraffin sections of the pancreata of KPeFC;*Egfr*<sup>lox/lox</sup>;*Raf1*<sup>lox/lox</sup> R2 mouse after six weeks of TMX exposure. Scale bar represents 1000  $\mu\text{m}$ . Box inset marks the area shown at higher magnification in the adjacent images shown to the right stained for H&E, EGFR, CK19, pERK and Ki67. Scale bar represents 50  $\mu\text{m}$ .

**Table S3. *KRAS* and *TP53* mutations in PDX tumor models. Related to figure 7.**

| <b>ID</b> | <b>PDX tumor model</b> | <b><i>KRAS</i> mutation</b> | <b><i>TP53</i> mutation</b> |
|-----------|------------------------|-----------------------------|-----------------------------|
| PDX-1     | PDAC003T               | G12D                        | Q136P                       |
| PDX-2     | Panc-1                 | G12D                        | P72R, K129R                 |
| PDX-3     | PDAC013T               | G12D                        | I254T                       |
| PDX-4     | Panc-4                 | G12D                        | P72R, R282W                 |
| PDX-5     | Panc-198               | G12D                        | D208V                       |
| PDX-6     | Panc-2                 | G12D                        | P72R, R282W                 |
| PDX-7     | Panc-185               | G12D                        | K120R                       |
| PDX-8     | H-PDAC-H-X 132         | G12V                        | C275R                       |
| PDX-9     | H-PDAC-M-X 3           | Q61H                        | H179Y                       |
| PDX-10    | H-PDAC-M-X 7           | Q61H                        | WT                          |

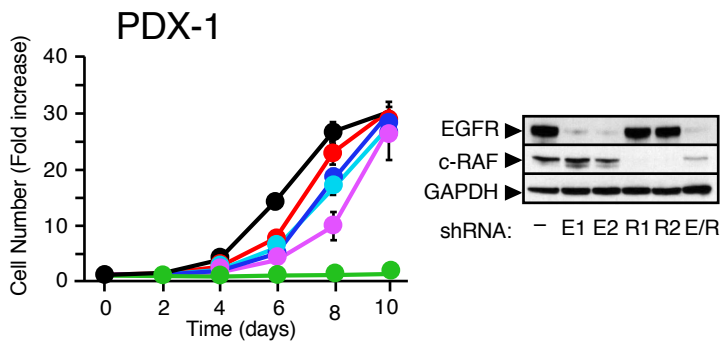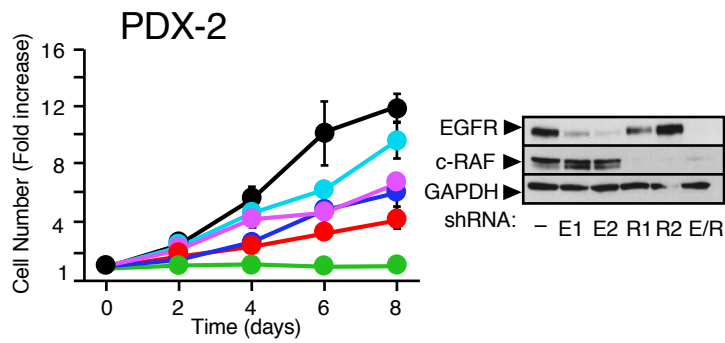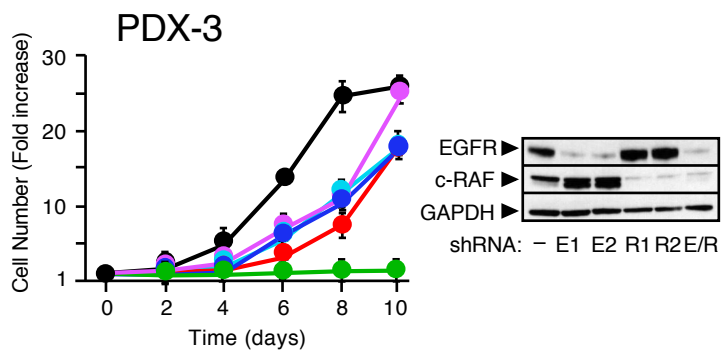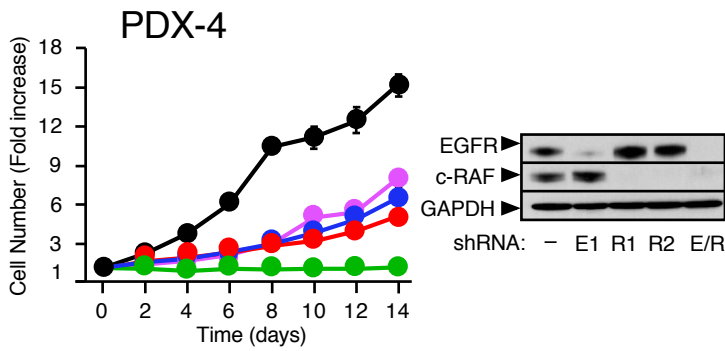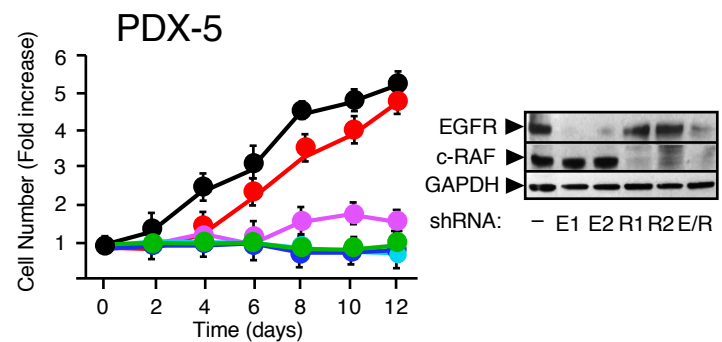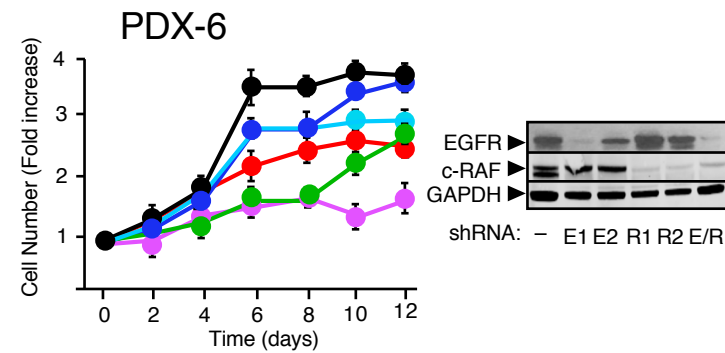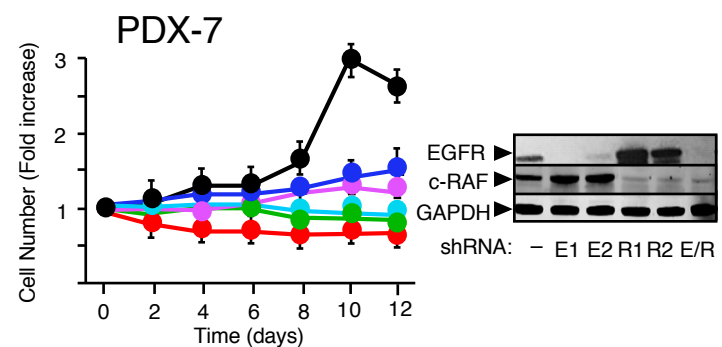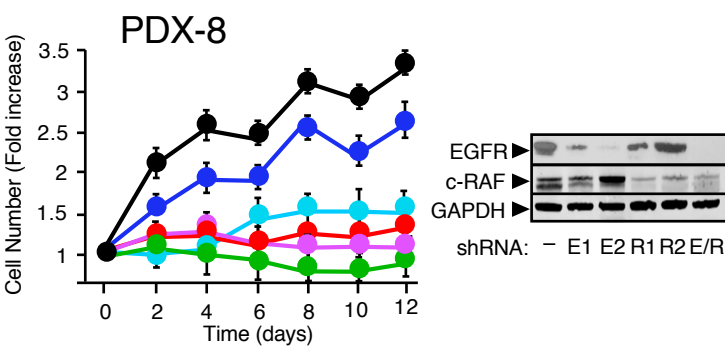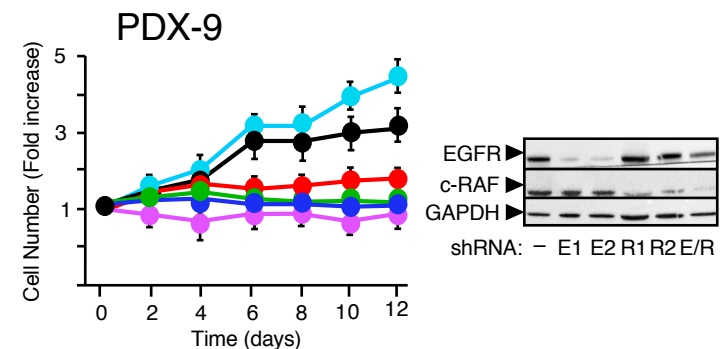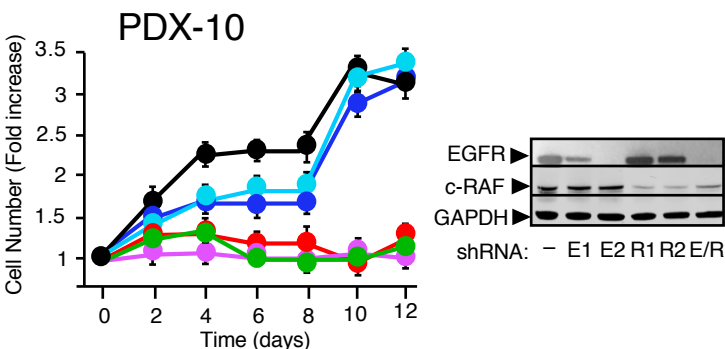

**Figure S4. EGFR and c-RAF expression is essential for *in vitro* proliferation of PDAC cells-derived from PDX tumor models. Related to Figure 7.**

(Left) Cell proliferation of the indicated PDX-derived cells infected with a scramble shRNA (black) or with shRNAs against *EGFR* (light and dark blue), *RAF1* (red and pink) and *EGFR* plus *RAF1* (green). (Right) Western blot analysis of EGFR and c-RAF expression in whole cell extracts obtained from the indicated PDX-derived cells using either a scramble shRNA (–), shRNAs against *EGFR* (E1, E2), *RAF1* (R1, R2) and *EGFR* plus *RAF1* (E1/R1) (right). Proliferation was determined by MTT and expressed as fold increase in the number of cells determined at each of the indicated days. Error bars indicate mean  $\pm$  SD. GAPDH served as loading control.



**Table S4. IC<sub>50</sub> of Gefitinib and Erlotinib for each of the PDX-derived cells. Related to Figure 8.**

| ID     | PDX tumor model | IC <sub>50</sub> (μM) |           |
|--------|-----------------|-----------------------|-----------|
|        |                 | Gefitinib             | Erlotinib |
| PDX-1  | PDAC003T        | 13.2                  | 11.7      |
| PDX-2  | Panc-1          | 11.3                  | 6.1       |
| PDX-3  | PDAC013T        | 3.3                   | 2.05      |
| PDX-4  | Panc-4          | 2.8                   | 2.82      |
| PDX-5  | Panc-198        | 14.9                  | 32.8      |
| PDX-6  | Panc-2          | 18.7                  | >100      |
| PDX-7  | Panc-185        | 16.8                  | 10.1      |
| PDX-8  | H-PDAC-H-X 132  | 15.2                  | >100      |
| PDX-9  | H-PDAC-M-X 3    | 5.4                   | 24.5      |
| PDX-10 | H-PDAC-M-X 7    | 15.8                  | 74.3      |
